# Supplementary material for: A Genotype-Phenotype Correlation Study of Exon Skip-Equivalent In-Frame Deletions and Exon Skip-Amenable Out-of-Frame Deletions across the DMD Gene to Simulate the Effects of Exon-Skipping Therapies: A Meta-Analysis
Source: MDPI journal article supplement (doi:10.3390/jpm11010046), 2021-01-14
Supplement: s1 [file s1]

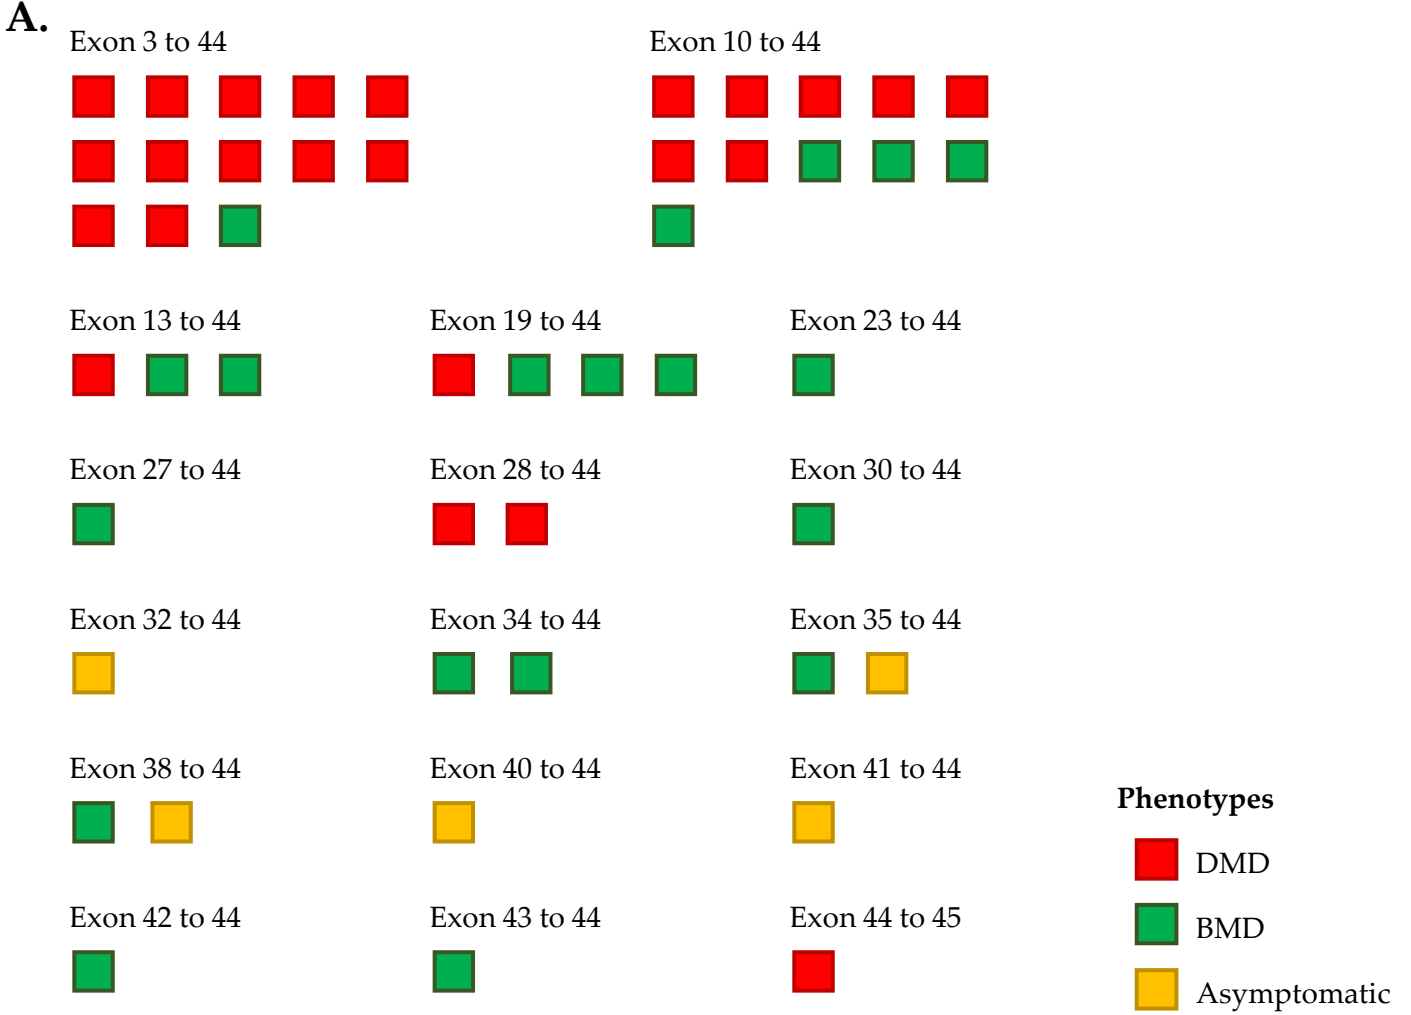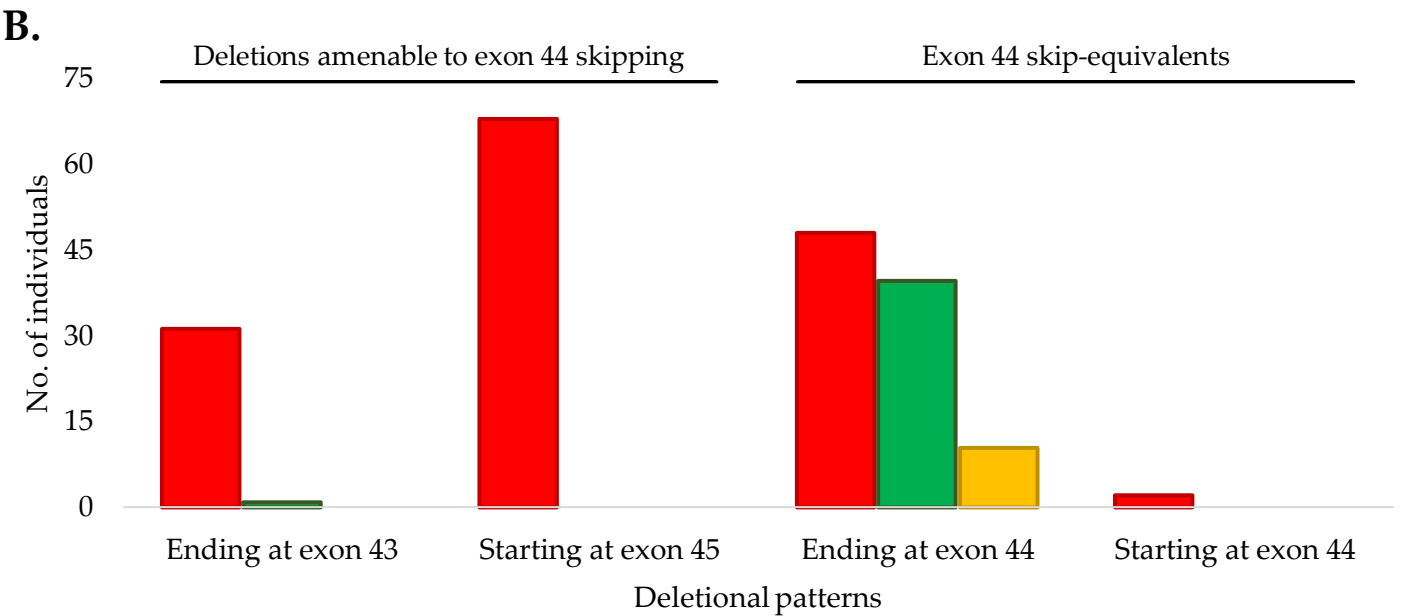

**Figure S8:** Phenotypes associated with different exon 44 skip equivalent and amenable to exon 44 skipping mutations. **(A)** Distribution of phenotypes for each exon-44 skip equivalent deletion subset. Individual patients are grouped depending on the pattern of deletion and their phenotypes are represented by colored squares. **(B)** Phenotypic comparison of deletional patterns between in-frame skip-equivalent deletions and patients eligible for exon 44 skipping with out-of-frame deletions (UMD-DMD France database).
