# Supplementary material for: A Genotype-Phenotype Correlation Study of Exon Skip-Equivalent In-Frame Deletions and Exon Skip-Amenable Out-of-Frame Deletions across the DMD Gene to Simulate the Effects of Exon-Skipping Therapies: A Meta-Analysis
Source: MDPI journal article supplement (doi:10.3390/jpm11010046), 2021-01-14
Supplement: s1 [file s1]

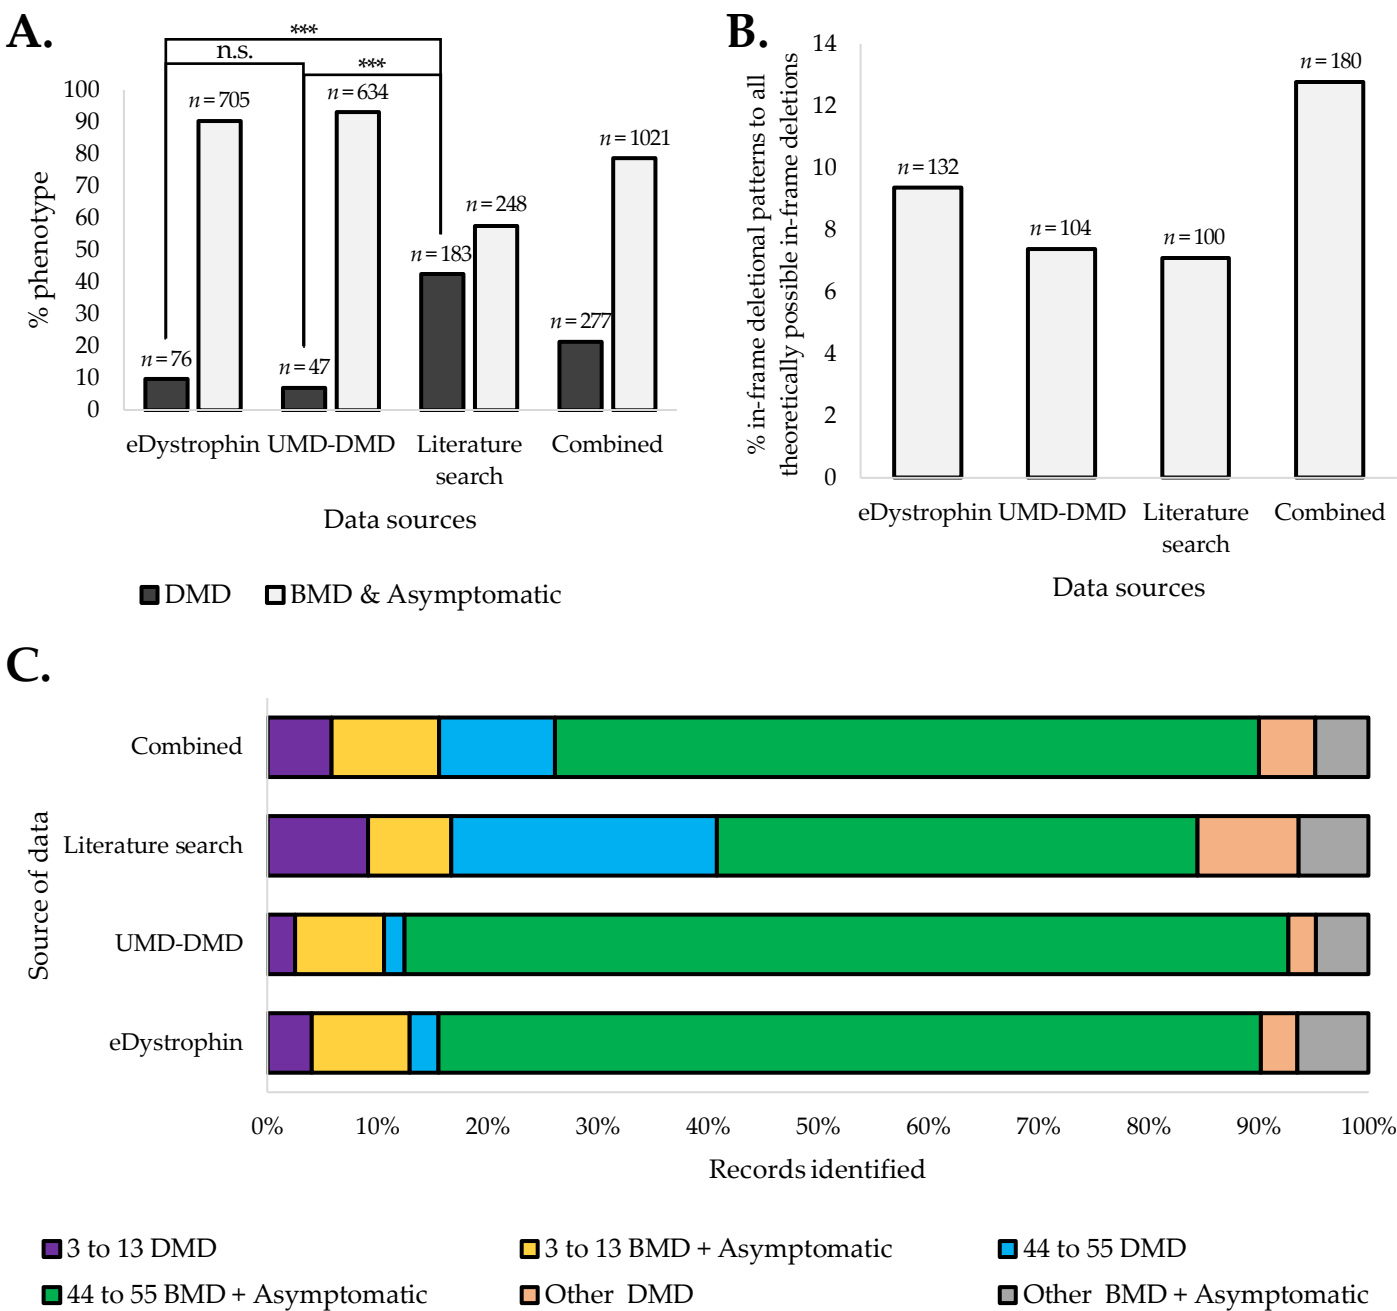

**Figure S2.** Patient pool and *dystrophin* mutational patterns among the individuals with in-frame large deletions. (A) Sources of the clinical data on individuals with in-frame large deletions in *dystrophin*. (B) The proportion of deletions present to all theoretically possible in-frame large deletions ( $N = 1408$ ) in each data source. (C) Frequency of in-frame large deletions starting or ending at exons 3 to 13 and exons 44 to 55 regions, compared to all other exons.  $***p < 0.0001$ , n.s. indicates a non-significant difference.
