# Supplementary material for: A Genotype-Phenotype Correlation Study of Exon Skip-Equivalent In-Frame Deletions and Exon Skip-Amenable Out-of-Frame Deletions across the DMD Gene to Simulate the Effects of Exon-Skipping Therapies: A Meta-Analysis
Source: MDPI journal article supplement (doi:10.3390/jpm11010046), 2021-01-14
Supplement: s1 [file s1]

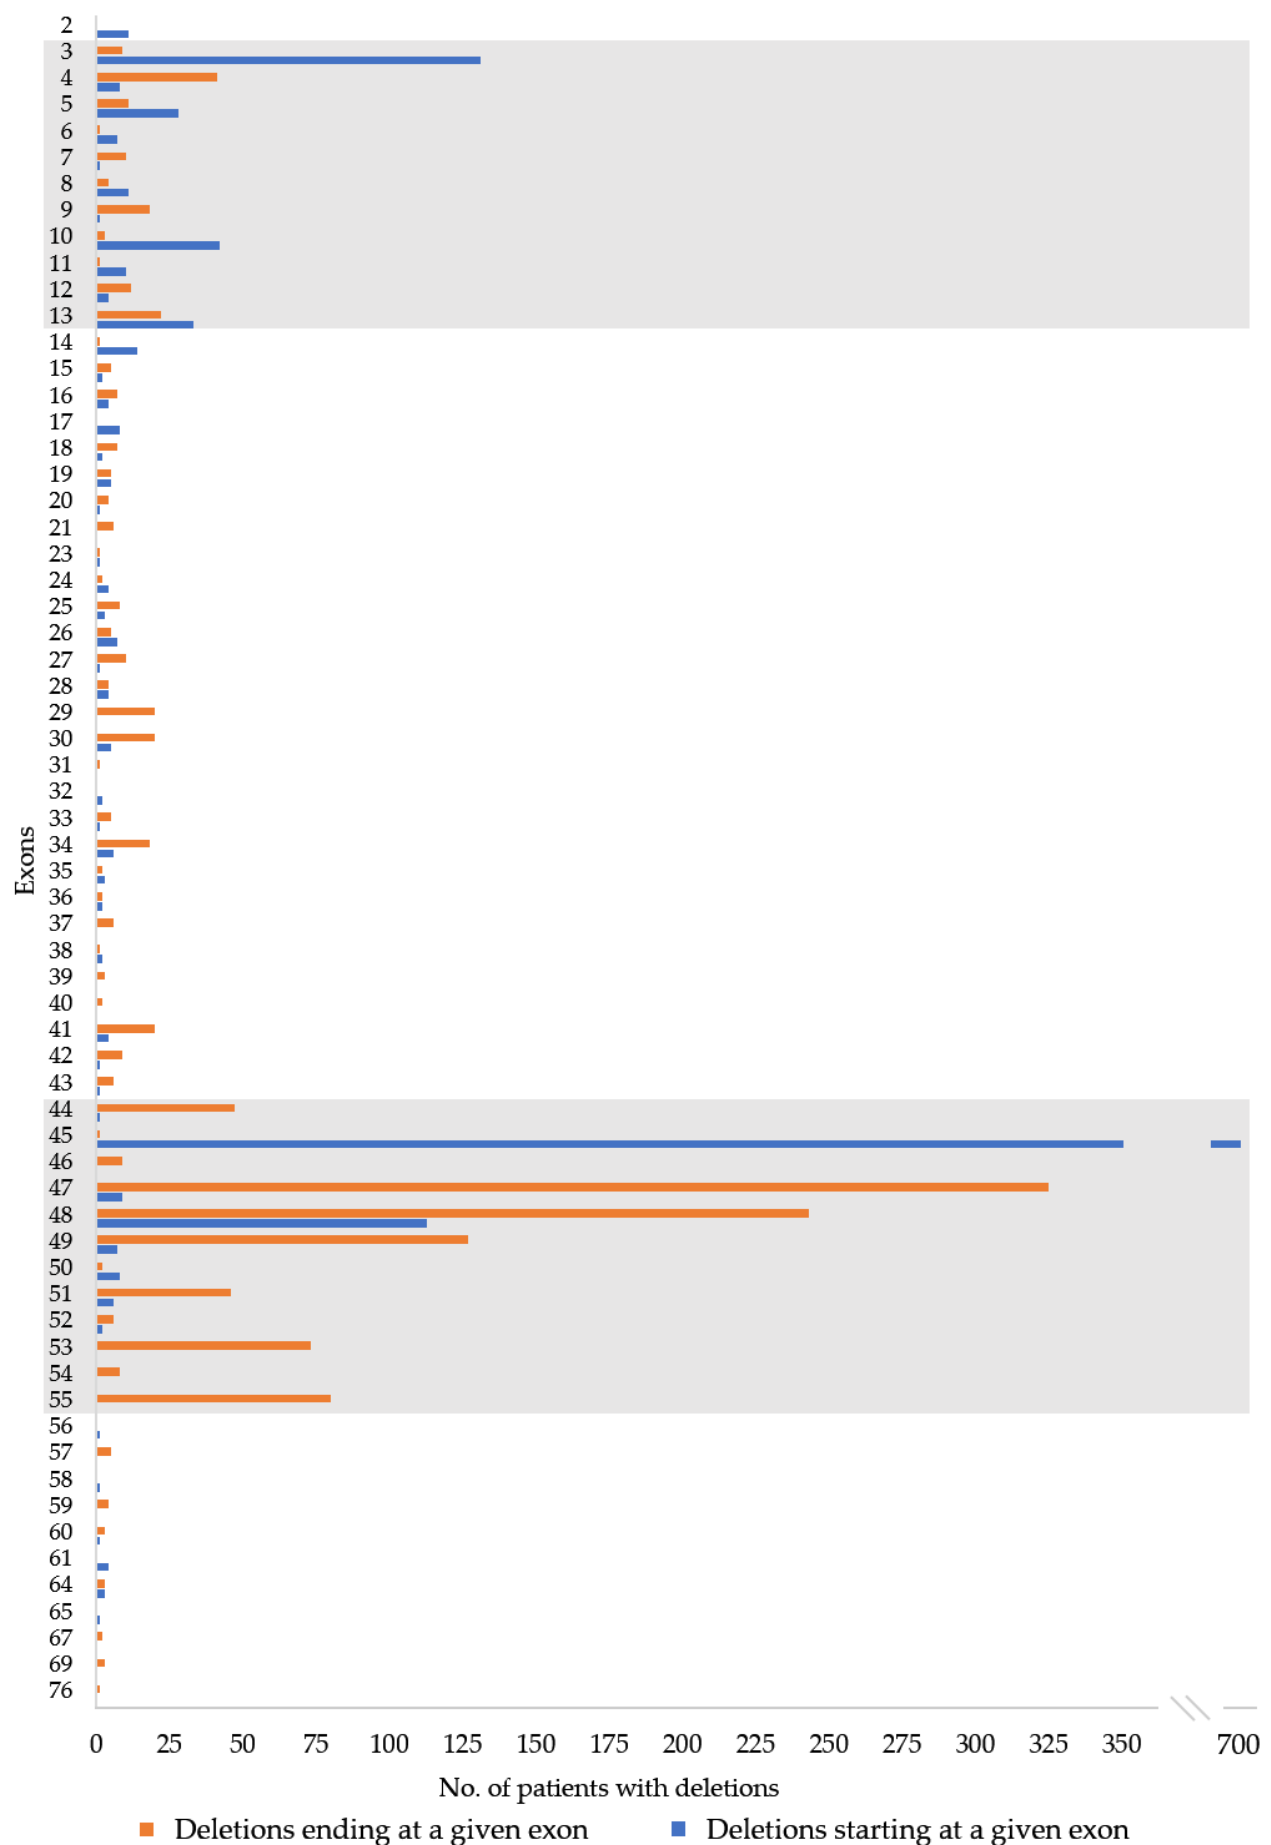

**Figure S3.** Frequency of deletions starting and/or ending at a given exon was significantly high in a proximal (exons 3 to 13,  $p$ -value = 0.000015,  $f$  = 20.64776) and a distal (exons 44 to 55,  $p$ -value = 0.000069,  $f$  = 17.2277) region. 88.12% of individuals harbored deletions starting and/or ending within these two regions of the dystrophin. The average frequency of in-frame deletions starting and/or ending at a given region and all other exons was compared using  $f$ -statistic.
