# Supplementary material for: A Genotype-Phenotype Correlation Study of Exon Skip-Equivalent In-Frame Deletions and Exon Skip-Amenable Out-of-Frame Deletions across the DMD Gene to Simulate the Effects of Exon-Skipping Therapies: A Meta-Analysis
Source: MDPI journal article supplement (doi:10.3390/jpm11010046), 2021-01-14
Supplement: s1 [file s1]

A.

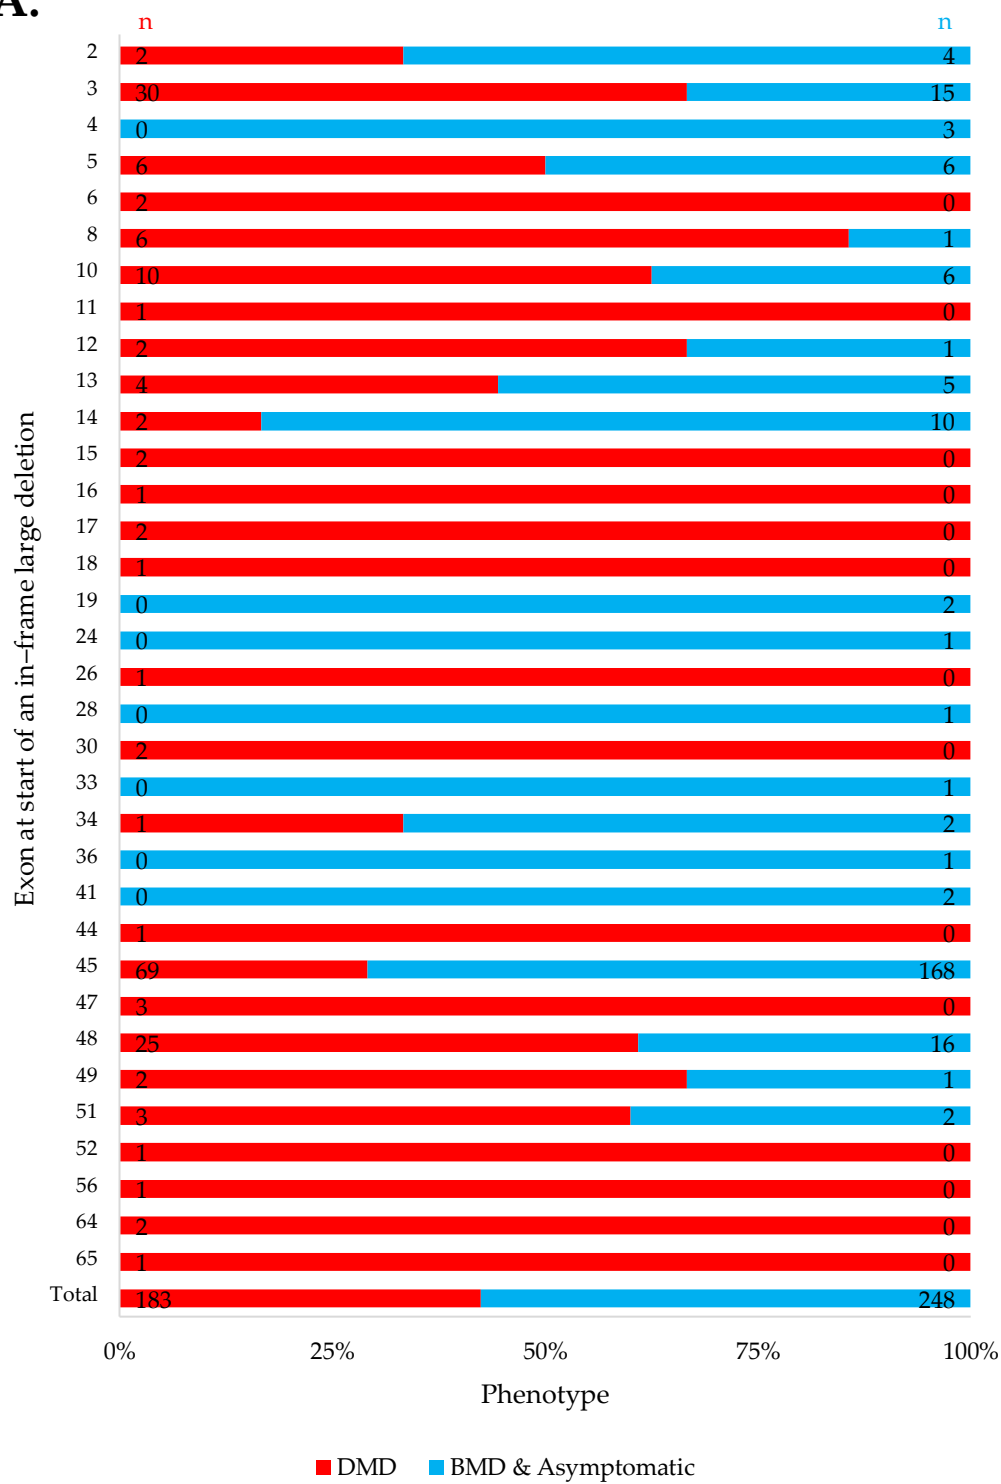

B.

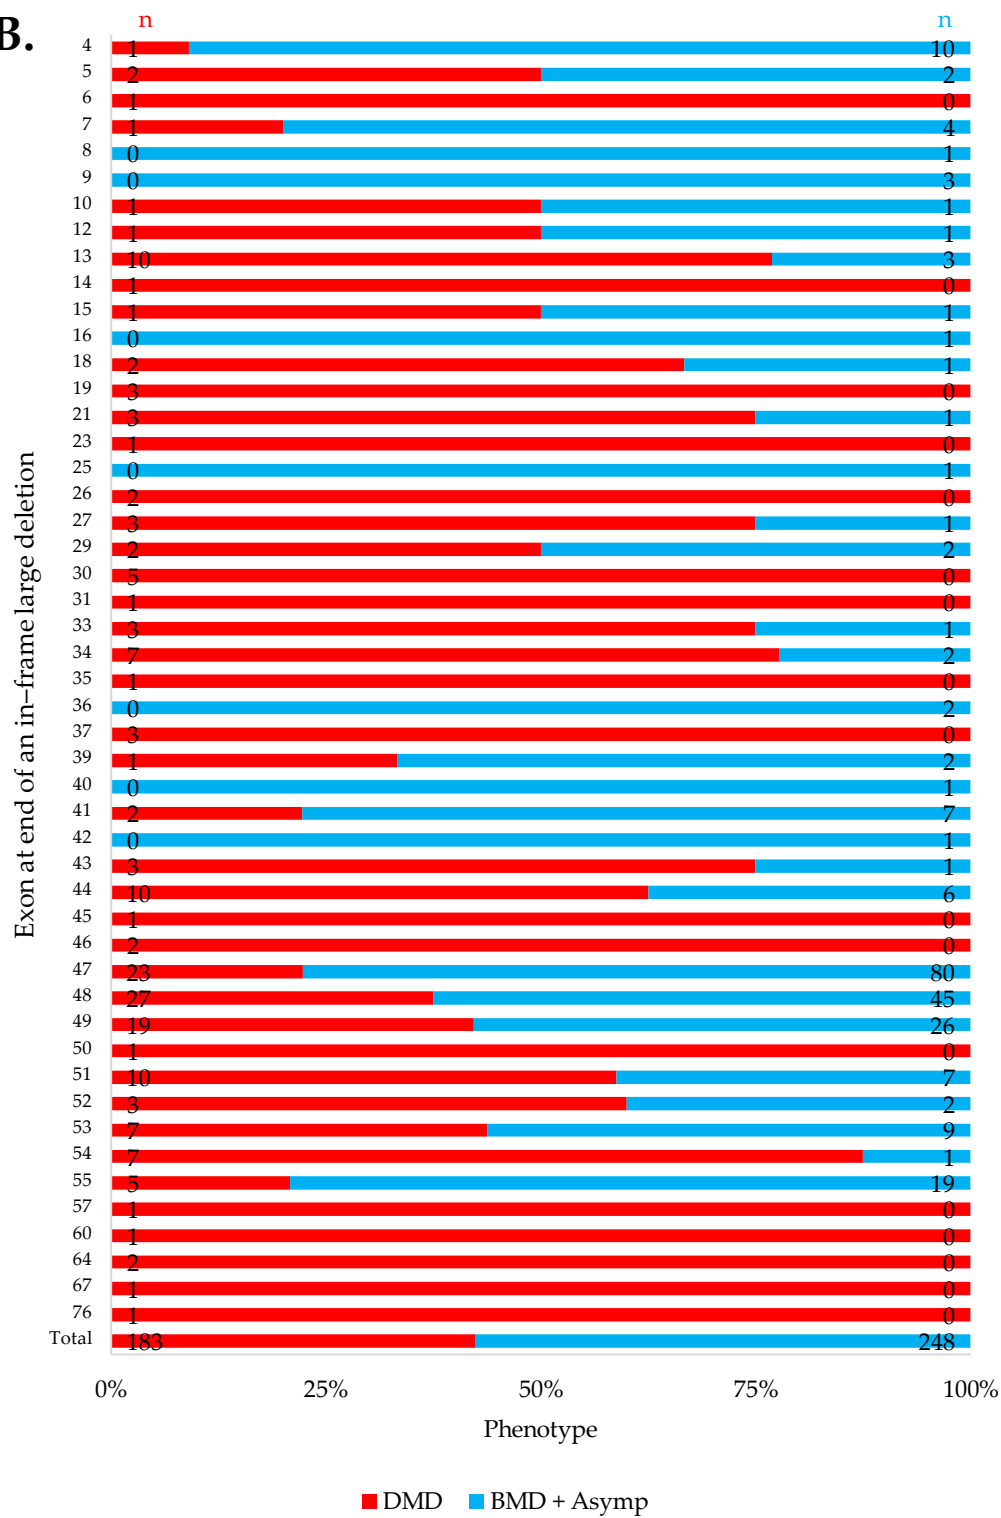

C.

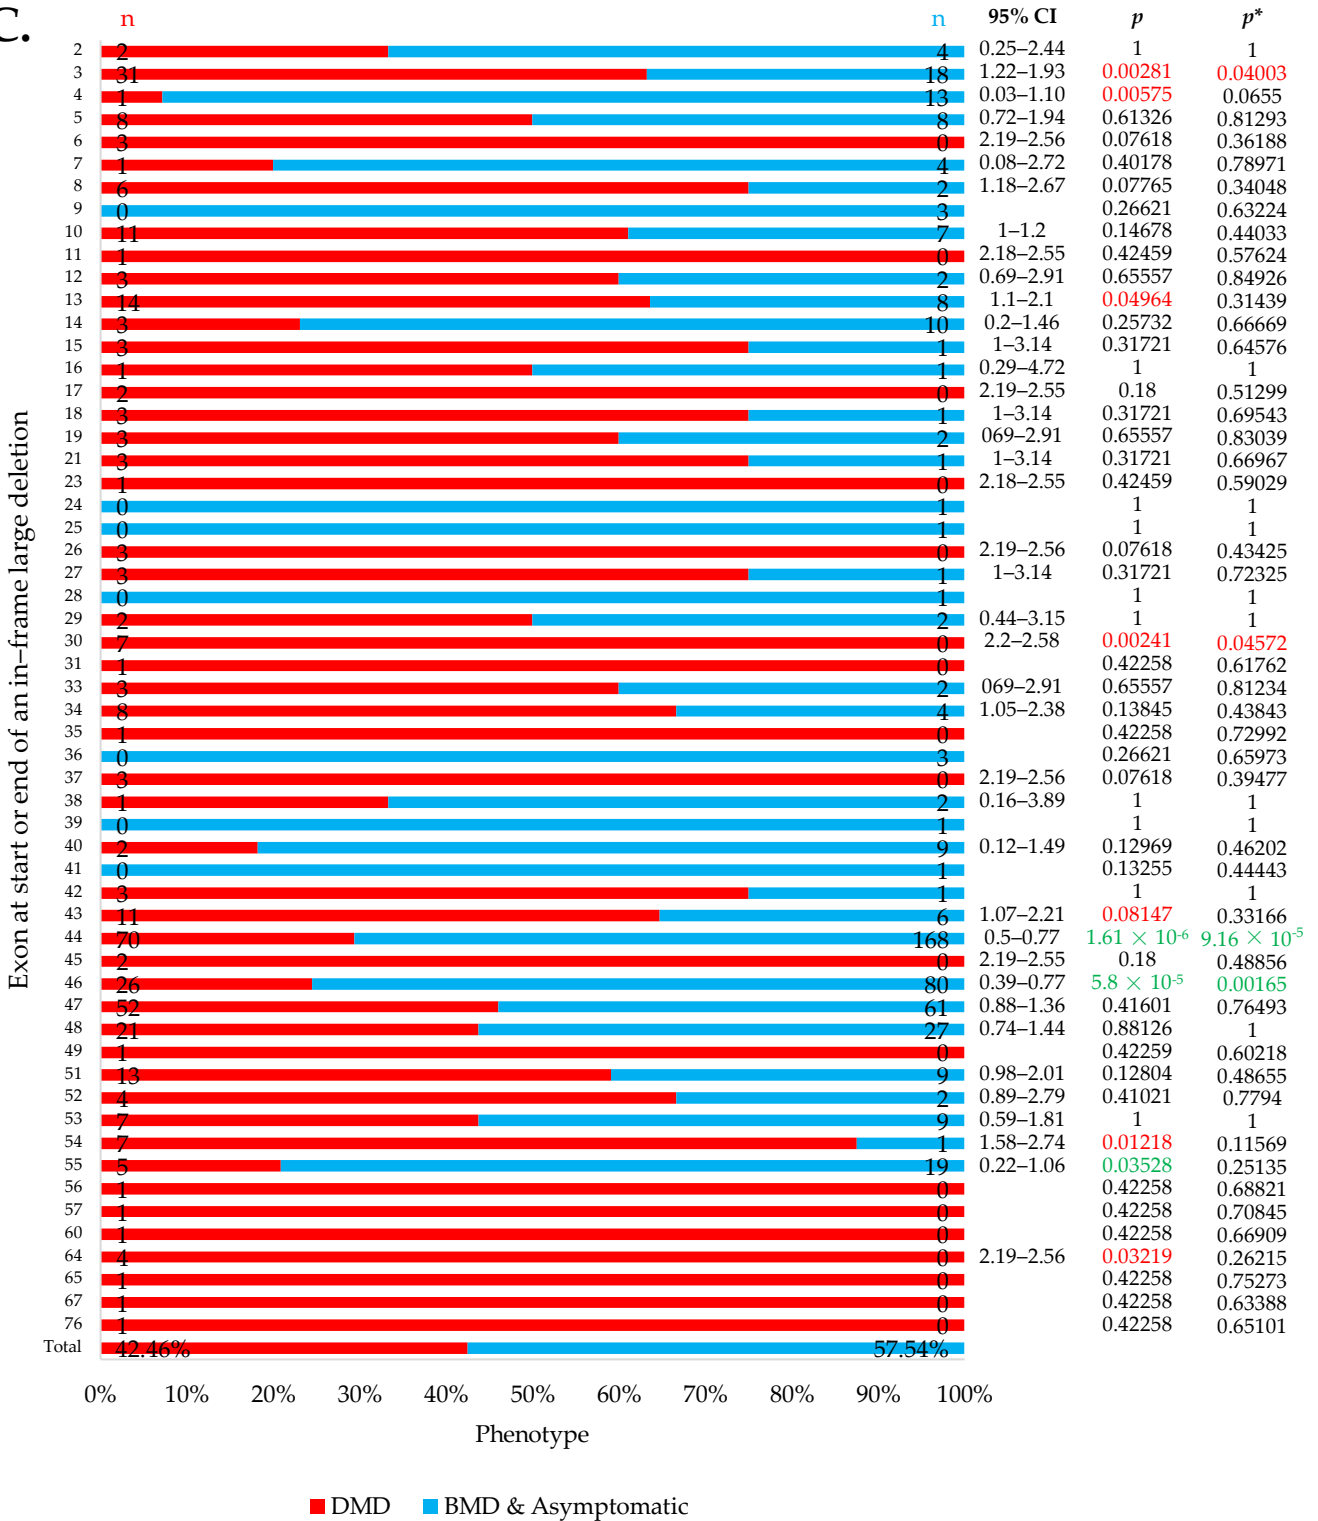

**Figure S6.** Association between in-frame deletions (A) starting, (B) ending, and (C) starting and/or ending at each exon and consequent phenotypes in the records identified from existing literature. Phenotypic ratios associated with in-frame deletions starting and/or ending at a given exon and all other exons were compared using a two-tailed Fisher's exact test. *n* indicates the number of individuals with DMD (red) and milder (blue; BMD and asymptomatic) phenotypes. Green and red asterisks indicate a significantly lower and higher incidence of DMD phenotype, respectively. *p* = *p*-value, as calculated by Fisher's exact test; *p*\* = Benjamini-Hochberg adjusted *p*-value.
