# Supplementary material for: A Genotype-Phenotype Correlation Study of Exon Skip-Equivalent In-Frame Deletions and Exon Skip-Amenable Out-of-Frame Deletions across the DMD Gene to Simulate the Effects of Exon-Skipping Therapies: A Meta-Analysis
Source: MDPI journal article supplement (doi:10.3390/jpm11010046), 2021-01-14
Supplement: s1 [file s1]

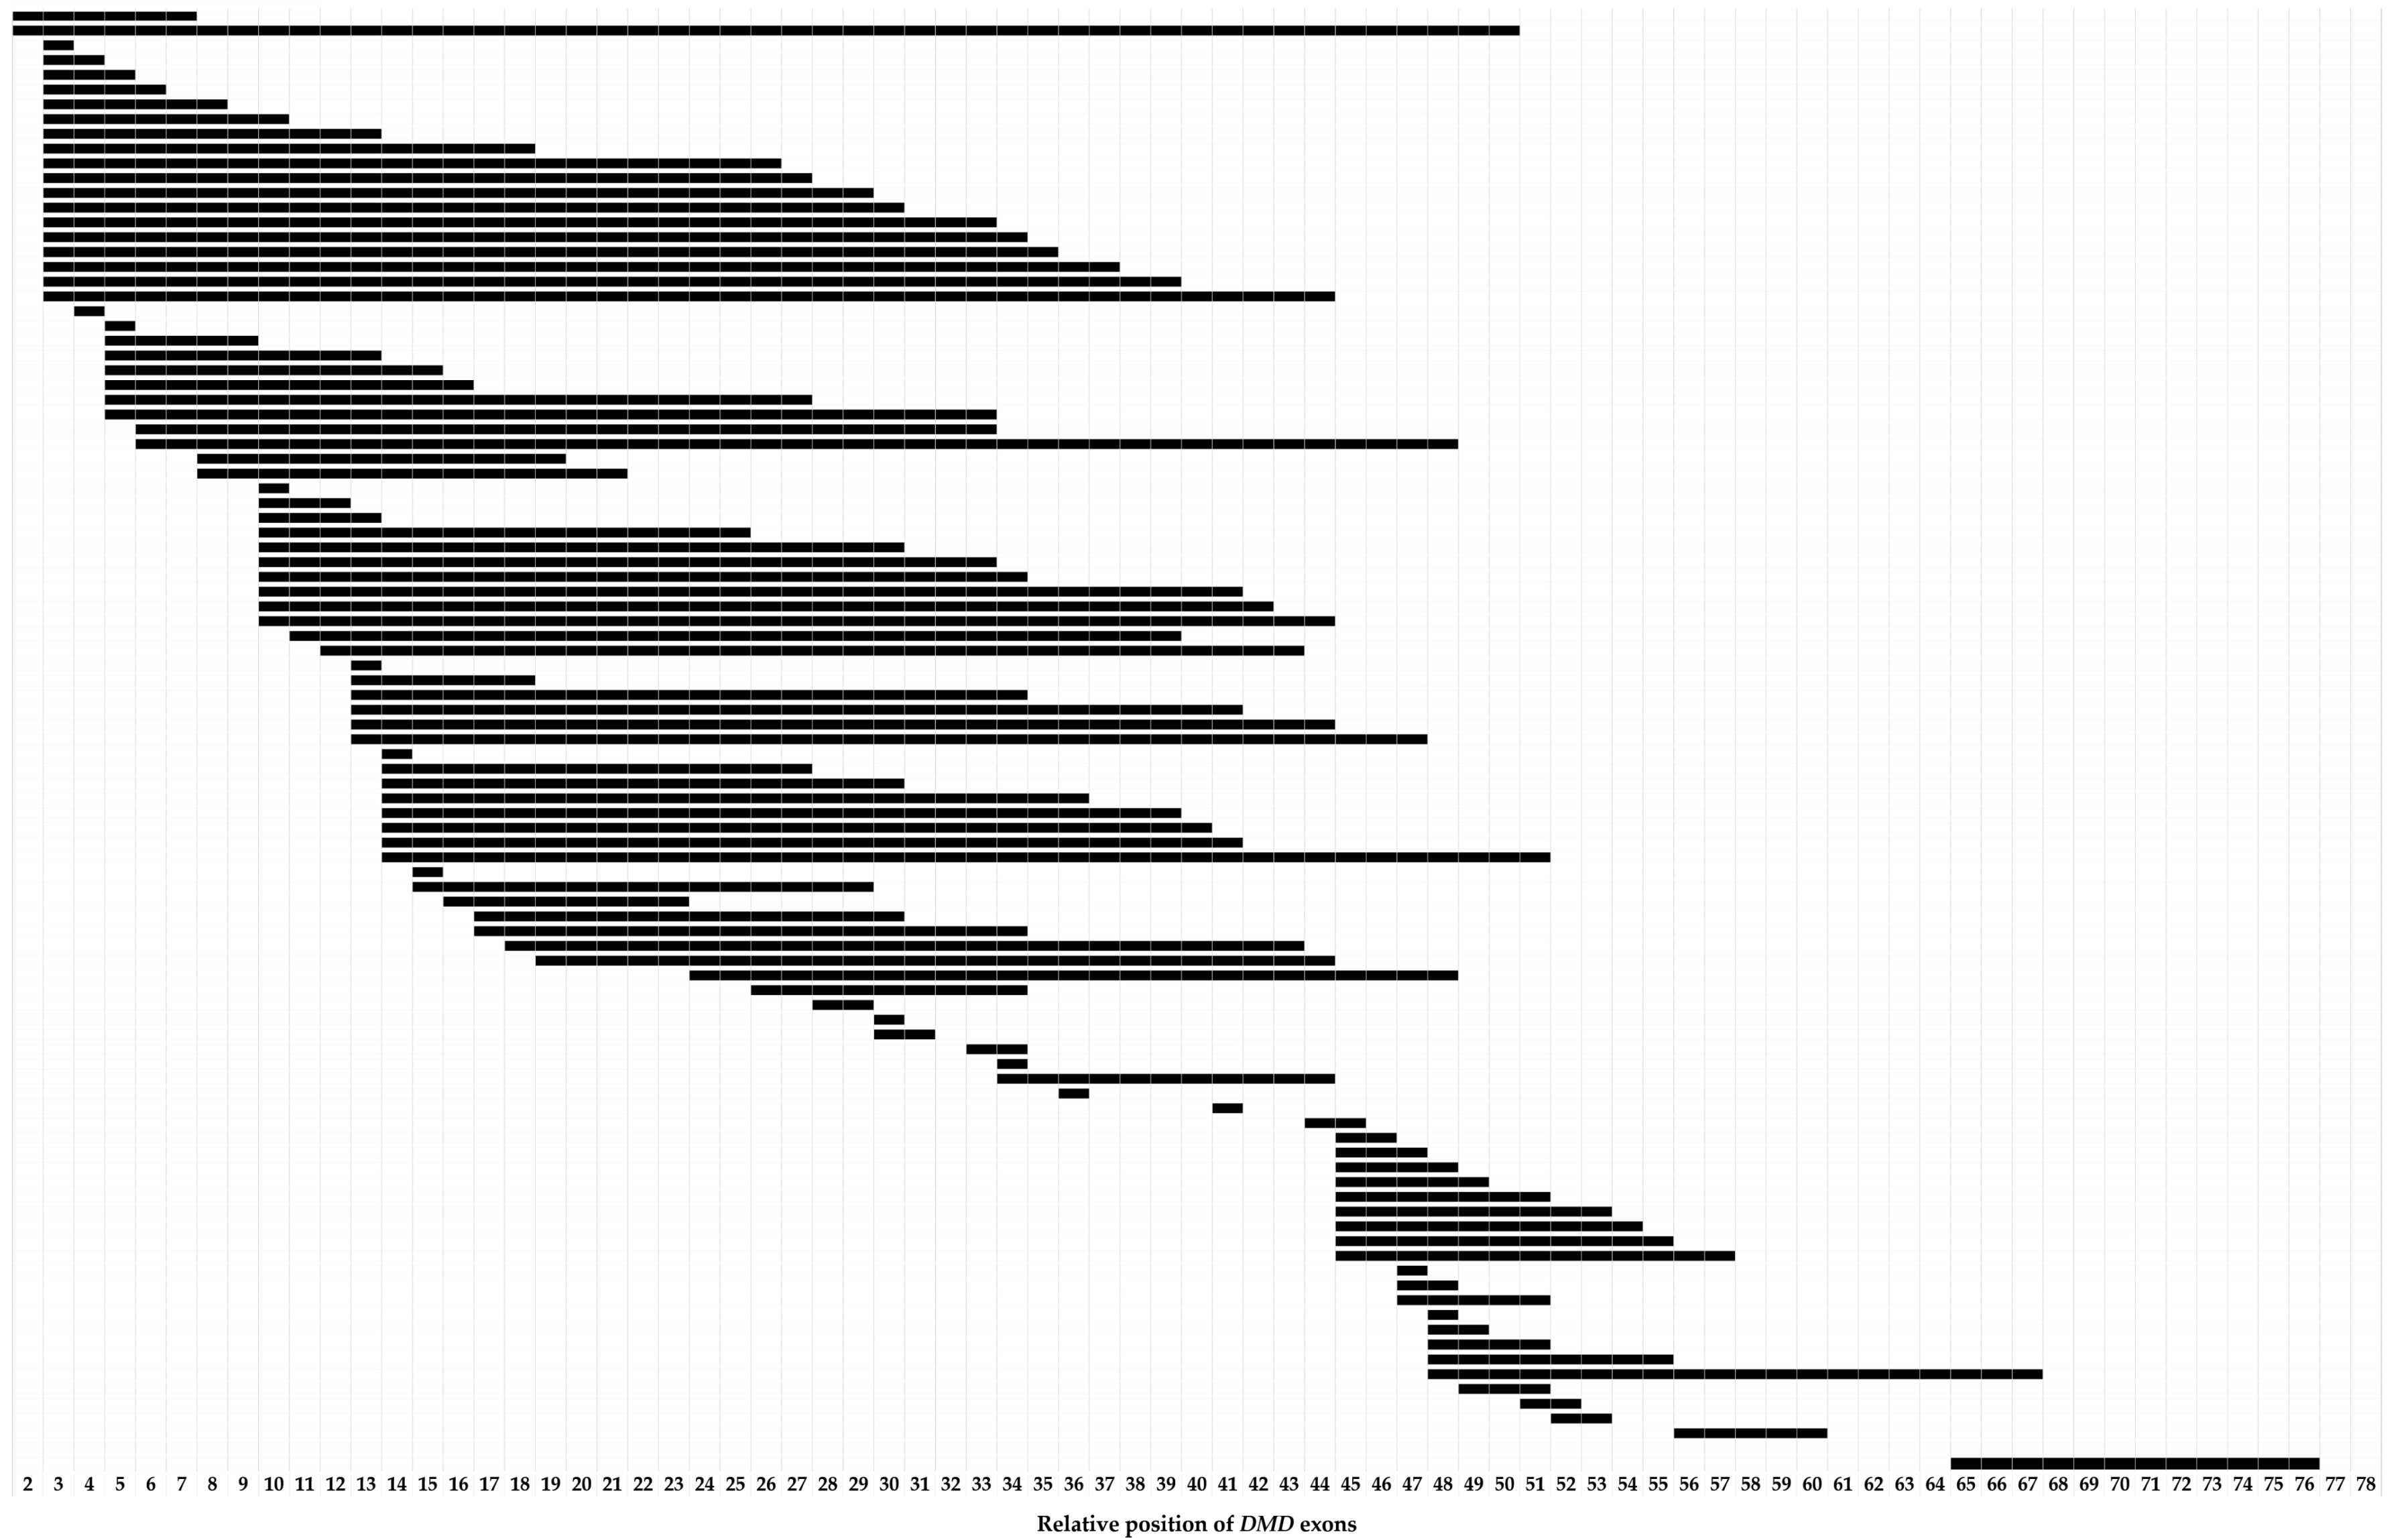

**Figure S1:** Deletional pattern in the *DMD* gene. From left to right on the bottom row represents the number of exons (2–78) in the *DMD* gene. The black shaded area shows the range of each deletion in *DMD* gene.
