# Supplementary material for: A Genotype-Phenotype Correlation Study of Exon Skip-Equivalent In-Frame Deletions and Exon Skip-Amenable Out-of-Frame Deletions across the DMD Gene to Simulate the Effects of Exon-Skipping Therapies: A Meta-Analysis
Source: MDPI journal article supplement (doi:10.3390/jpm11010046), 2021-01-14
Supplement: s1 [file s1]

**Table S2:** List of all theoretically possible in-frame deletion within *dystrophin*. Bold-underlined numbers indicate deletions found in the eDystrophin database, while cells with green fonts and yellow highlighter refers to the deletions obtained from the UMD-DMD France database and literature searching, respectively.

| Deletion starts at exon | Deletion ends at exon | Deletion starts at exon | Deletion ends at exon |
|-------------------------|-----------------------|-------------------------|-----------------------|
| <u>2</u>                | <u>7</u>              | 23                      | 57                    |
| 2                       | 19                    | 23                      | 59                    |
| 2                       | 21                    | 23                      | 60                    |
| 2                       | 50                    | 23                      | 67                    |
| 2                       | 52                    | 23                      | 69                    |
| 2                       | 58                    | 23                      | 75                    |
| 2                       | 61                    | 23                      | 78                    |
| 2                       | 63                    | <u>24</u>               | <u>24</u>             |
| 2                       | 64                    | <u>24</u>               | <u>25</u>             |
| 2                       | 66                    | 24                      | 26                    |
| 2                       | 76                    | <u>24</u>               | <u>27</u>             |
| 2                       | 77                    | 24                      | 28                    |
| <u>3</u>                | <u>3</u>              | 24                      | 29                    |
| <u>3</u>                | <u>4</u>              | 24                      | 30                    |
| <u>3</u>                | <u>5</u>              | 24                      | 31                    |
| 3                       | 8                     | 24                      | 32                    |
| <u>3</u>                | <u>9</u>              | 24                      | 33                    |
| 3                       | 10                    | 24                      | 34                    |
| <u>3</u>                | <u>12</u>             | 24                      | 35                    |
| <u>3</u>                | <u>13</u>             | 24                      | 36                    |
| 3                       | 14                    | 24                      | 37                    |
| <u>3</u>                | <u>15</u>             | 24                      | 38                    |
| <u>3</u>                | <u>16</u>             | 24                      | 39                    |
| <u>3</u>                | <u>18</u>             | 24                      | 40                    |
| <u>3</u>                | <u>20</u>             | 24                      | 41                    |
| 3                       | 22                    | 24                      | 42                    |
| 3                       | 23                    | 24                      | 44                    |
| 3                       | 24                    | 24                      | 46                    |
| <u>3</u>                | <u>25</u>             | 24                      | 47                    |
| <u>3</u>                | <u>26</u>             | 24                      | 48                    |
| <u>3</u>                | <u>27</u>             | 24                      | 49                    |
| 3                       | 28                    | 24                      | 51                    |
| <u>3</u>                | <u>29</u>             | 24                      | 53                    |
| <u>3</u>                | <u>30</u>             | 24                      | 55                    |
| 3                       | 31                    | 24                      | 57                    |
| 3                       | 32                    | 24                      | 59                    |
| <u>3</u>                | <u>33</u>             | 24                      | 60                    |
| <u>3</u>                | <u>34</u>             | 24                      | 67                    |

| Deletion starts at exon | Deletion ends at exon | Deletion starts at exon | Deletion ends at exon |
|-------------------------|-----------------------|-------------------------|-----------------------|
| <u>3</u>                | <u>35</u>             | 24                      | 69                    |
| 3                       | 36                    | 24                      | 75                    |
| <u>3</u>                | <u>37</u>             | 24                      | 78                    |
| 3                       | 38                    | <u>25</u>               | <u>25</u>             |
| <u>3</u>                | <u>39</u>             | 25                      | 26                    |
| 3                       | 40                    | 25                      | 27                    |
| <u>3</u>                | <u>41</u>             | 25                      | 28                    |
| <u>3</u>                | <u>42</u>             | 25                      | 29                    |
| <u>3</u>                | <u>44</u>             | 25                      | 30                    |
| 3                       | 46                    | 25                      | 31                    |
| <u>3</u>                | <u>47</u>             | 25                      | 32                    |
| 3                       | 48                    | 25                      | 33                    |
| <u>3</u>                | <u>49</u>             | 25                      | 34                    |
| 3                       | 51                    | 25                      | 35                    |
| 3                       | 53                    | 25                      | 36                    |
| 3                       | 55                    | 25                      | 37                    |
| 3                       | 57                    | 25                      | 38                    |
| 3                       | 59                    | 25                      | 39                    |
| 3                       | 60                    | 25                      | 40                    |
| 3                       | 67                    | 25                      | 41                    |
| 3                       | 69                    | 25                      | 42                    |
| 3                       | 75                    | 25                      | 44                    |
| 3                       | 78                    | 25                      | 46                    |
| <u>4</u>                | <u>4</u>              | 25                      | 47                    |
| 4                       | 5                     | 25                      | 48                    |
| 4                       | 8                     | 25                      | 49                    |
| 4                       | 9                     | 25                      | 51                    |
| 4                       | 10                    | 25                      | 53                    |
| <u>4</u>                | <u>12</u>             | 25                      | 55                    |
| <u>4</u>                | <u>13</u>             | 25                      | 57                    |
| 4                       | 14                    | 25                      | 59                    |
| 4                       | 15                    | 25                      | 60                    |
| 4                       | 16                    | 25                      | 67                    |
| 4                       | 18                    | 25                      | 69                    |
| 4                       | 20                    | 25                      | 75                    |
| 4                       | 22                    | 25                      | 78                    |
| 4                       | 23                    | <u>26</u>               | <u>26</u>             |
| 4                       | 24                    | 26                      | 27                    |
| 4                       | 25                    | <u>26</u>               | <u>28</u>             |
| 4                       | 26                    | 26                      | 29                    |
| 4                       | 27                    | <u>26</u>               | <u>30</u>             |
| 4                       | 28                    | 26                      | 31                    |

| Deletion starts at exon | Deletion ends at exon | Deletion starts at exon | Deletion ends at exon |
|-------------------------|-----------------------|-------------------------|-----------------------|
| 4                       | 29                    | 26                      | 32                    |
| <b>4</b>                | <b>30</b>             | 26                      | 33                    |
| 4                       | 31                    | <b>26</b>               | <b>34</b>             |
| 4                       | 32                    | 26                      | 35                    |
| 4                       | 33                    | 26                      | 36                    |
| 4                       | 34                    | 26                      | 37                    |
| 4                       | 35                    | 26                      | 38                    |
| 4                       | 36                    | 26                      | 39                    |
| 4                       | 37                    | 26                      | 40                    |
| 4                       | 38                    | 26                      | 41                    |
| 4                       | 39                    | 26                      | 42                    |
| 4                       | 40                    | 26                      | 44                    |
| 4                       | 41                    | 26                      | 46                    |
| 4                       | 42                    | 26                      | 47                    |
| 4                       | 44                    | 26                      | 48                    |
| 4                       | 46                    | 26                      | 49                    |
| 4                       | 47                    | 26                      | 51                    |
| 4                       | 48                    | 26                      | 53                    |
| 4                       | 49                    | 26                      | 55                    |
| 4                       | 51                    | 26                      | 57                    |
| 4                       | 53                    | 26                      | 59                    |
| 4                       | 55                    | 26                      | 60                    |
| 4                       | 57                    | 26                      | 67                    |
| 4                       | 59                    | 26                      | 69                    |
| 4                       | 60                    | 26                      | 75                    |
| 4                       | 67                    | 26                      | 78                    |
| 4                       | 69                    | 27                      | 27                    |
| 4                       | 75                    | 27                      | 28                    |
| 4                       | 78                    | 27                      | 29                    |
| <b>5</b>                | <b>5</b>              | 27                      | 30                    |
| 5                       | 8                     | 27                      | 31                    |
| <b>5</b>                | <b>9</b>              | 27                      | 32                    |
| 5                       | 10                    | 27                      | 33                    |
| 5                       | 12                    | 27                      | 34                    |
| <b>5</b>                | <b>13</b>             | 27                      | 35                    |
| 5                       | 14                    | 27                      | 36                    |
| <b>5</b>                | <b>15</b>             | 27                      | 37                    |
| <b>5</b>                | <b>16</b>             | 27                      | 38                    |
| <b>5</b>                | <b>18</b>             | 27                      | 39                    |
| 5                       | 20                    | 27                      | 40                    |
| 5                       | 22                    | 27                      | 41                    |
| 5                       | 23                    | 27                      | 42                    |

| Deletion starts at exon | Deletion ends at exon | Deletion starts at exon | Deletion ends at exon |
|-------------------------|-----------------------|-------------------------|-----------------------|
| 5                       | 24                    | 27                      | 44                    |
| 5                       | 25                    | 27                      | 46                    |
| 5                       | 26                    | 27                      | 47                    |
| 5                       | 27                    | 27                      | 48                    |
| 5                       | 28                    | 27                      | 49                    |
| 5                       | 29                    | 27                      | 51                    |
| 5                       | 30                    | 27                      | 53                    |
| 5                       | 31                    | 27                      | 55                    |
| 5                       | 32                    | 27                      | 57                    |
| 5                       | 33                    | 27                      | 59                    |
| 5                       | 34                    | 27                      | 60                    |
| 5                       | 35                    | 27                      | 67                    |
| 5                       | 36                    | 27                      | 69                    |
| <u>5</u>                | <u>37</u>             | 27                      | 75                    |
| 5                       | 38                    | 27                      | 78                    |
| 5                       | 39                    | 28                      | 28                    |
| 5                       | 40                    | <u>28</u>               | <u>29</u>             |
| 5                       | 41                    | 28                      | 30                    |
| 5                       | 42                    | 28                      | 31                    |
| <u>5</u>                | <u>44</u>             | 28                      | 32                    |
| 5                       | 46                    | 28                      | 33                    |
| 5                       | 47                    | 28                      | 34                    |
| <u>5</u>                | <u>48</u>             | 28                      | 35                    |
| 5                       | 49                    | 28                      | 36                    |
| 5                       | 51                    | 28                      | 37                    |
| 5                       | 53                    | 28                      | 38                    |
| 5                       | 55                    | 28                      | 39                    |
| 5                       | 57                    | 28                      | 40                    |
| 5                       | 59                    | 28                      | 41                    |
| 5                       | 60                    | 28                      | 42                    |
| 5                       | 67                    | <u>28</u>               | <u>44</u>             |
| 5                       | 69                    | 28                      | 46                    |
| 5                       | 75                    | 28                      | 47                    |
| 5                       | 78                    | 28                      | 48                    |
| <u>6</u>                | <u>8</u>              | <u>28</u>               | <u>49</u>             |
| 6                       | 9                     | 28                      | 51                    |
| 6                       | 10                    | 28                      | 53                    |
| <u>6</u>                | <u>12</u>             | 28                      | 55                    |
| <u>6</u>                | <u>13</u>             | 28                      | 57                    |
| 6                       | 14                    | 28                      | 59                    |
| 6                       | 15                    | 28                      | 60                    |
| 6                       | 16                    | 28                      | 67                    |

| Deletion starts at exon | Deletion ends at exon | Deletion starts at exon | Deletion ends at exon |
|-------------------------|-----------------------|-------------------------|-----------------------|
| 6                       | 18                    | 28                      | 69                    |
| 6                       | 20                    | 28                      | 75                    |
| 6                       | 22                    | 28                      | 78                    |
| 6                       | 23                    | 29                      | 29                    |
| 6                       | 24                    | 29                      | 30                    |
| 6                       | 25                    | 29                      | 31                    |
| 6                       | 26                    | 29                      | 32                    |
| 6                       | 27                    | 29                      | 33                    |
| 6                       | 28                    | 29                      | 34                    |
| 6                       | 29                    | 29                      | 35                    |
| 6                       | 30                    | 29                      | 36                    |
| 6                       | 31                    | 29                      | 37                    |
| 6                       | 32                    | 29                      | 38                    |
| 6                       | 33                    | 29                      | 39                    |
| 6                       | 34                    | 29                      | 40                    |
| 6                       | 35                    | 29                      | 41                    |
| 6                       | 36                    | 29                      | 42                    |
| 6                       | 37                    | 29                      | 44                    |
| 6                       | 38                    | 29                      | 46                    |
| 6                       | 39                    | 29                      | 47                    |
| 6                       | 40                    | 29                      | 48                    |
| 6                       | 41                    | 29                      | 49                    |
| 6                       | 42                    | 29                      | 51                    |
| 6                       | 44                    | 29                      | 53                    |
| 6                       | 46                    | 29                      | 55                    |
| 6                       | 47                    | 29                      | 57                    |
| 6                       | 48                    | 29                      | 59                    |
| 6                       | 49                    | 29                      | 60                    |
| 6                       | 51                    | 29                      | 67                    |
| 6                       | 53                    | 29                      | 69                    |
| 6                       | 55                    | 29                      | 75                    |
| 6                       | 57                    | 29                      | 78                    |
| 6                       | 59                    | <u>30</u>               | <u>30</u>             |
| 6                       | 60                    | 30                      | 31                    |
| 6                       | 67                    | 30                      | 32                    |
| 6                       | 69                    | 30                      | 33                    |
| 6                       | 75                    | 30                      | 34                    |
| 6                       | 78                    | 30                      | 35                    |
| <u>7</u>                | <u>11</u>             | 30                      | 36                    |
| 7                       | 17                    | 30                      | 37                    |
| 7                       | 43                    | 30                      | 38                    |
| 7                       | 45                    | 30                      | 39                    |

| Deletion starts at exon | Deletion ends at exon | Deletion starts at exon | Deletion ends at exon |
|-------------------------|-----------------------|-------------------------|-----------------------|
| 7                       | 54                    | 30                      | 40                    |
| 7                       | 56                    | 30                      | 41                    |
| 7                       | 62                    | <u>30</u>               | <u>42</u>             |
| 7                       | 65                    | <u>30</u>               | <u>44</u>             |
| 7                       | 68                    | 30                      | 46                    |
| 7                       | 70                    | 30                      | 47                    |
| 7                       | 71                    | 30                      | 48                    |
| 7                       | 72                    | 30                      | 49                    |
| 7                       | 73                    | 30                      | 51                    |
| 7                       | 74                    | 30                      | 53                    |
| <u>8</u>                | <u>19</u>             | 30                      | 55                    |
| <u>8</u>                | <u>21</u>             | 30                      | 57                    |
| 8                       | 50                    | 30                      | 59                    |
| 8                       | 52                    | 30                      | 60                    |
| 8                       | 58                    | 30                      | 67                    |
| 8                       | 61                    | 30                      | 69                    |
| 8                       | 63                    | 30                      | 75                    |
| 8                       | 64                    | 30                      | 78                    |
| 8                       | 66                    | 31                      | 31                    |
| 8                       | 76                    | 31                      | 32                    |
| 8                       | 77                    | 31                      | 33                    |
| 9                       | 9                     | 31                      | 34                    |
| 9                       | 10                    | 31                      | 35                    |
| <u>9</u>                | <u>12</u>             | 31                      | 36                    |
| 9                       | 13                    | 31                      | 37                    |
| 9                       | 14                    | 31                      | 38                    |
| 9                       | 15                    | 31                      | 39                    |
| 9                       | 16                    | 31                      | 40                    |
| 9                       | 18                    | 31                      | 41                    |
| 9                       | 20                    | 31                      | 42                    |
| 9                       | 22                    | 31                      | 44                    |
| 9                       | 23                    | 31                      | 46                    |
| 9                       | 24                    | 31                      | 47                    |
| 9                       | 25                    | 31                      | 48                    |
| 9                       | 26                    | 31                      | 49                    |
| 9                       | 27                    | 31                      | 51                    |
| 9                       | 28                    | 31                      | 53                    |
| 9                       | 29                    | 31                      | 55                    |
| 9                       | 30                    | 31                      | 57                    |
| 9                       | 31                    | 31                      | 59                    |
| 9                       | 32                    | 31                      | 60                    |
| 9                       | 33                    | 31                      | 67                    |

| Deletion starts at exon | Deletion ends at exon | Deletion starts at exon | Deletion ends at exon |
|-------------------------|-----------------------|-------------------------|-----------------------|
| 9                       | 34                    | 31                      | 69                    |
| 9                       | 35                    | 31                      | 75                    |
| 9                       | 36                    | 31                      | 78                    |
| 9                       | 37                    | 32                      | 32                    |
| 9                       | 38                    | 32                      | 33                    |
| 9                       | 39                    | 32                      | 34                    |
| 9                       | 40                    | 32                      | 35                    |
| 9                       | 41                    | 32                      | 36                    |
| 9                       | 42                    | 32                      | 37                    |
| 9                       | 44                    | 32                      | 38                    |
| 9                       | 46                    | 32                      | 39                    |
| 9                       | 47                    | 32                      | 40                    |
| 9                       | 48                    | 32                      | 41                    |
| 9                       | 49                    | <u>32</u>               | <u>42</u>             |
| 9                       | 51                    | <u>32</u>               | <u>44</u>             |
| 9                       | 53                    | 32                      | 46                    |
| 9                       | 55                    | 32                      | 47                    |
| 9                       | 57                    | 32                      | 48                    |
| 9                       | 59                    | 32                      | 49                    |
| 9                       | 60                    | 32                      | 51                    |
| 9                       | 67                    | 32                      | 53                    |
| 9                       | 69                    | 32                      | 55                    |
| 9                       | 75                    | 32                      | 57                    |
| 9                       | 78                    | 32                      | 59                    |
| 10                      | 10                    | 32                      | 60                    |
| 10                      | 12                    | 32                      | 67                    |
| 10                      | 13                    | 32                      | 69                    |
| 10                      | 14                    | 32                      | 75                    |
| <u>10</u>               | <u>15</u>             | 32                      | 78                    |
| <u>10</u>               | <u>16</u>             | 33                      | 33                    |
| <u>10</u>               | <u>18</u>             | 33                      | 34                    |
| 10                      | 20                    | 33                      | 35                    |
| 10                      | 22                    | 33                      | 36                    |
| 10                      | 23                    | 33                      | 37                    |
| 10                      | 24                    | 33                      | 38                    |
| 10                      | 25                    | 33                      | 39                    |
| <u>10</u>               | <u>26</u>             | 33                      | 40                    |
| 10                      | 27                    | 33                      | 41                    |
| <u>10</u>               | <u>28</u>             | 33                      | 42                    |
| <u>10</u>               | <u>29</u>             | 33                      | 44                    |
| 10                      | 30                    | 33                      | 46                    |
| 10                      | 31                    | 33                      | 47                    |

| Deletion starts at exon | Deletion ends at exon | Deletion starts at exon | Deletion ends at exon |
|-------------------------|-----------------------|-------------------------|-----------------------|
| 10                      | 32                    | 33                      | 48                    |
| <u>10</u>               | <u>33</u>             | 33                      | 49                    |
| <u>10</u>               | <u>34</u>             | 33                      | 51                    |
| 10                      | 35                    | 33                      | 53                    |
| 10                      | 36                    | 33                      | 55                    |
| <u>10</u>               | <u>37</u>             | 33                      | 57                    |
| <u>10</u>               | <u>38</u>             | 33                      | 59                    |
| 10                      | 39                    | 33                      | 60                    |
| 10                      | 40                    | 33                      | 67                    |
| <u>10</u>               | <u>41</u>             | 33                      | 69                    |
| <u>10</u>               | <u>42</u>             | 33                      | 75                    |
| <u>10</u>               | <u>44</u>             | 33                      | 78                    |
| 10                      | 46                    | <u>34</u>               | <u>34</u>             |
| 10                      | 47                    | 34                      | 35                    |
| <u>10</u>               | <u>48</u>             | 34                      | 36                    |
| 10                      | 49                    | 34                      | 37                    |
| 10                      | 51                    | 34                      | 38                    |
| 10                      | 53                    | 34                      | 39                    |
| 10                      | 55                    | 34                      | 40                    |
| 10                      | 57                    | 34                      | 41                    |
| 10                      | 59                    | 34                      | 42                    |
| 10                      | 60                    | <u>34</u>               | <u>44</u>             |
| 10                      | 67                    | 34                      | 46                    |
| 10                      | 69                    | 34                      | 47                    |
| 10                      | 75                    | 34                      | 48                    |
| 10                      | 78                    | 34                      | 49                    |
| 11                      | 12                    | 34                      | 51                    |
| 11                      | 13                    | 34                      | 53                    |
| 11                      | 14                    | 34                      | 55                    |
| 11                      | 15                    | 34                      | 57                    |
| 11                      | 16                    | 34                      | 59                    |
| 11                      | 18                    | 34                      | 60                    |
| 11                      | 20                    | 34                      | 67                    |
| 11                      | 22                    | 34                      | 69                    |
| 11                      | 23                    | 34                      | 75                    |
| 11                      | 24                    | 34                      | 78                    |
| 11                      | 25                    | 35                      | 35                    |
| 11                      | 26                    | 35                      | 36                    |
| <u>11</u>               | <u>27</u>             | 35                      | 37                    |
| 11                      | 28                    | 35                      | 38                    |
| <u>11</u>               | <u>29</u>             | 35                      | 39                    |
| <u>11</u>               | <u>30</u>             | 35                      | 40                    |



| Deletion starts at exon | Deletion ends at exon | Deletion starts at exon | Deletion ends at exon |
|-------------------------|-----------------------|-------------------------|-----------------------|
| 11                      | 31                    | 35                      | 41                    |
| 11                      | 32                    | <u>35</u>               | <u>42</u>             |
| 11                      | 33                    | <u>35</u>               | <u>44</u>             |
| 11                      | 34                    | 35                      | 46                    |
| 11                      | 35                    | 35                      | 47                    |
| 11                      | 36                    | 35                      | 48                    |
| 11                      | 37                    | 35                      | 49                    |
| 11                      | 38                    | 35                      | 51                    |
| 11                      | 39                    | 35                      | 53                    |
| 11                      | 40                    | 35                      | 55                    |
| 11                      | 41                    | 35                      | 57                    |
| 11                      | 42                    | 35                      | 59                    |
| 11                      | 44                    | 35                      | 60                    |
| 11                      | 46                    | 35                      | 67                    |
| 11                      | 47                    | 35                      | 69                    |
| 11                      | 48                    | 35                      | 75                    |
| 11                      | 49                    | 35                      | 78                    |
| 11                      | 51                    | 36                      | 36                    |
| 11                      | 53                    | 36                      | 37                    |
| 11                      | 55                    | 36                      | 38                    |
| 11                      | 57                    | 36                      | 39                    |
| 11                      | 59                    | 36                      | 40                    |
| 11                      | 60                    | 36                      | 41                    |
| 11                      | 67                    | 36                      | 42                    |
| 11                      | 69                    | 36                      | 44                    |
| 11                      | 75                    | <u>36</u>               | <u>46</u>             |
| 11                      | 78                    | 36                      | 47                    |
| 12                      | 17                    | 36                      | 48                    |
| 12                      | 43                    | 36                      | 49                    |
| 12                      | 45                    | 36                      | 51                    |
| 12                      | 54                    | 36                      | 53                    |
| 12                      | 56                    | 36                      | 55                    |
| 12                      | 62                    | 36                      | 57                    |
| 12                      | 65                    | 36                      | 59                    |
| 12                      | 68                    | 36                      | 60                    |
| 12                      | 70                    | 36                      | 67                    |
| 12                      | 71                    | 36                      | 69                    |
| 12                      | 72                    | 36                      | 75                    |
| 12                      | 73                    | 36                      | 78                    |
| 12                      | 74                    | 37                      | 37                    |
| 13                      | 13                    | 37                      | 38                    |
| 13                      | 14                    | 37                      | 39                    |

| Deletion starts at exon | Deletion ends at exon | Deletion starts at exon | Deletion ends at exon |
|-------------------------|-----------------------|-------------------------|-----------------------|
| 13                      | 15                    | 37                      | 40                    |
| 13                      | 16                    | 37                      | 41                    |
| 13                      | 18                    | 37                      | 42                    |
| 13                      | 20                    | 37                      | 44                    |
| 13                      | 22                    | 37                      | 46                    |
| 13                      | 23                    | 37                      | 47                    |
| 13                      | 24                    | 37                      | 48                    |
| 13                      | 25                    | 37                      | 49                    |
| 13                      | 26                    | 37                      | 51                    |
| 13                      | 27                    | 37                      | 53                    |
| 13                      | 28                    | 37                      | 55                    |
| 13                      | 29                    | 37                      | 57                    |
| 13                      | 30                    | 37                      | 59                    |
| 13                      | 31                    | 37                      | 60                    |
| 13                      | 32                    | 37                      | 67                    |
| 13                      | 33                    | 37                      | 69                    |
| 13                      | 34                    | 37                      | 75                    |
| 13                      | 35                    | 37                      | 78                    |
| 13                      | 36                    | 38                      | 38                    |
| 13                      | 37                    | 38                      | 39                    |
| 13                      | 38                    | 38                      | 40                    |
| 13                      | 39                    | 38                      | 41                    |
| 13                      | 40                    | 38                      | 42                    |
| 13                      | 41                    | 38                      | 44                    |
| 13                      | 42                    | 38                      | 46                    |
| 13                      | 44                    | 38                      | 47                    |
| 13                      | 46                    | 38                      | 48                    |
| 13                      | 47                    | 38                      | 49                    |
| 13                      | 48                    | 38                      | 51                    |
| 13                      | 49                    | 38                      | 53                    |
| 13                      | 51                    | 38                      | 55                    |
| 13                      | 53                    | 38                      | 57                    |
| 13                      | 55                    | 38                      | 59                    |
| 13                      | 57                    | 38                      | 60                    |
| 13                      | 59                    | 38                      | 67                    |
| 13                      | 60                    | 38                      | 69                    |
| 13                      | 67                    | 38                      | 75                    |
| 13                      | 69                    | 38                      | 78                    |
| 13                      | 75                    | 39                      | 39                    |
| 13                      | 78                    | 39                      | 40                    |
| 14                      | 14                    | 39                      | 41                    |
| 14                      | 15                    | 39                      | 42                    |

| Deletion starts at exon | Deletion ends at exon | Deletion starts at exon | Deletion ends at exon |
|-------------------------|-----------------------|-------------------------|-----------------------|
| 14                      | 16                    | 39                      | 44                    |
| 14                      | 18                    | 39                      | 46                    |
| 14                      | 20                    | 39                      | 47                    |
| 14                      | 22                    | 39                      | 48                    |
| 14                      | 23                    | 39                      | 49                    |
| 14                      | 24                    | 39                      | 51                    |
| 14                      | 25                    | 39                      | 53                    |
| 14                      | 26                    | 39                      | 55                    |
| 14                      | 27                    | 39                      | 57                    |
| 14                      | 28                    | 39                      | 59                    |
| 14                      | 29                    | 39                      | 60                    |
| 14                      | 30                    | 39                      | 67                    |
| 14                      | 31                    | 39                      | 69                    |
| 14                      | 32                    | 39                      | 75                    |
| 14                      | 33                    | 39                      | 78                    |
| 14                      | 34                    | 40                      | 40                    |
| 14                      | 35                    | 40                      | 41                    |
| 14                      | 36                    | 40                      | 42                    |
| 14                      | 37                    | <u>40</u>               | <u>44</u>             |
| 14                      | 38                    | 40                      | 46                    |
| 14                      | 39                    | 40                      | 47                    |
| 14                      | 40                    | 40                      | 48                    |
| <u>14</u>               | <u>41</u>             | 40                      | 49                    |
| 14                      | 42                    | 40                      | 51                    |
| 14                      | 44                    | 40                      | 53                    |
| 14                      | 46                    | 40                      | 55                    |
| 14                      | 47                    | 40                      | 57                    |
| 14                      | 48                    | 40                      | 59                    |
| 14                      | 49                    | 40                      | 60                    |
| 14                      | 51                    | 40                      | 67                    |
| 14                      | 53                    | 40                      | 69                    |
| 14                      | 55                    | 40                      | 75                    |
| 14                      | 57                    | 40                      | 78                    |
| 14                      | 59                    | <u>41</u>               | <u>41</u>             |
| 14                      | 60                    | 41                      | 42                    |
| 14                      | 67                    | <u>41</u>               | <u>44</u>             |
| 14                      | 69                    | 41                      | 46                    |
| 14                      | 75                    | 41                      | 47                    |
| 14                      | 78                    | 41                      | 48                    |
| 15                      | 15                    | 41                      | 49                    |
| 15                      | 16                    | 41                      | 51                    |
| 15                      | 18                    | 41                      | 53                    |

| Deletion starts at exon | Deletion ends at exon | Deletion starts at exon | Deletion ends at exon |
|-------------------------|-----------------------|-------------------------|-----------------------|
| 15                      | 20                    | 41                      | 55                    |
| 15                      | 22                    | 41                      | 57                    |
| 15                      | 23                    | 41                      | 59                    |
| 15                      | 24                    | 41                      | 60                    |
| 15                      | 25                    | 41                      | 67                    |
| 15                      | 26                    | 41                      | 69                    |
| 15                      | 27                    | 41                      | 75                    |
| 15                      | 28                    | 41                      | 78                    |
| 15                      | 29                    | 42                      | 42                    |
| 15                      | 30                    | <u>42</u>               | <u>44</u>             |
| 15                      | 31                    | 42                      | 46                    |
| 15                      | 32                    | 42                      | 47                    |
| 15                      | 33                    | 42                      | 48                    |
| 15                      | 34                    | 42                      | 49                    |
| 15                      | 35                    | 42                      | 51                    |
| 15                      | 36                    | 42                      | 53                    |
| 15                      | 37                    | 42                      | 55                    |
| 15                      | 38                    | 42                      | 57                    |
| 15                      | 39                    | 42                      | 59                    |
| 15                      | 40                    | 42                      | 60                    |
| 15                      | 41                    | 42                      | 67                    |
| 15                      | 42                    | 42                      | 69                    |
| 15                      | 44                    | 42                      | 75                    |
| 15                      | 46                    | 42                      | 78                    |
| 15                      | 47                    | <u>43</u>               | <u>44</u>             |
| 15                      | 48                    | 43                      | 46                    |
| 15                      | 49                    | 43                      | 47                    |
| 15                      | 51                    | 43                      | 48                    |
| 15                      | 53                    | 43                      | 49                    |
| 15                      | 55                    | 43                      | 51                    |
| 15                      | 57                    | 43                      | 53                    |
| 15                      | 59                    | 43                      | 55                    |
| 15                      | 60                    | 43                      | 57                    |
| 15                      | 67                    | 43                      | 59                    |
| 15                      | 69                    | 43                      | 60                    |
| 15                      | 75                    | 43                      | 67                    |
| 15                      | 78                    | 43                      | 69                    |
| <u>16</u>               | <u>16</u>             | 43                      | 75                    |
| 16                      | 18                    | 43                      | 78                    |
| 16                      | 20                    | <u>44</u>               | <u>45</u>             |
| 16                      | 22                    | <u>44</u>               | <u>54</u>             |
| 16                      | 23                    | 44                      | 56                    |

| Deletion starts at exon | Deletion ends at exon | Deletion starts at exon | Deletion ends at exon |
|-------------------------|-----------------------|-------------------------|-----------------------|
| 16                      | 24                    | 44                      | 62                    |
| 16                      | 25                    | 44                      | 65                    |
| 16                      | 26                    | 44                      | 68                    |
| 16                      | 27                    | 44                      | 70                    |
| 16                      | 28                    | 44                      | 71                    |
| <b><u>16</u></b>        | <b><u>29</u></b>      | 44                      | 72                    |
| 16                      | 30                    | 44                      | 73                    |
| 16                      | 31                    | 44                      | 74                    |
| 16                      | 32                    | <u>45</u>               | <u>46</u>             |
| 16                      | 33                    | <u>45</u>               | <u>47</u>             |
| 16                      | 34                    | <u>45</u>               | <u>48</u>             |
| 16                      | 35                    | <u>45</u>               | <u>49</u>             |
| 16                      | 36                    | <u>45</u>               | <u>51</u>             |
| 16                      | 37                    | <u>45</u>               | <u>53</u>             |
| 16                      | 38                    | <u>45</u>               | <u>55</u>             |
| 16                      | 39                    | <u>45</u>               | <u>57</u>             |
| 16                      | 40                    | 45                      | 59                    |
| 16                      | 41                    | 45                      | 60                    |
| 16                      | 42                    | 45                      | 67                    |
| 16                      | 44                    | 45                      | 69                    |
| 16                      | 46                    | 45                      | 75                    |
| 16                      | 47                    | 45                      | 78                    |
| 16                      | 48                    | 46                      | 54                    |
| 16                      | 49                    | 46                      | 56                    |
| 16                      | 51                    | 46                      | 62                    |
| 16                      | 53                    | 46                      | 65                    |
| 16                      | 55                    | 46                      | 68                    |
| 16                      | 57                    | 46                      | 70                    |
| 16                      | 59                    | 46                      | 71                    |
| 16                      | 60                    | 46                      | 72                    |
| 16                      | 67                    | 46                      | 73                    |
| 16                      | 69                    | 46                      | 74                    |
| 16                      | 75                    | <u>47</u>               | <u>47</u>             |
| 16                      | 78                    | <u>47</u>               | <u>48</u>             |
| 17                      | 18                    | <u>47</u>               | <u>49</u>             |
| 17                      | 20                    | <u>47</u>               | <u>51</u>             |
| 17                      | 22                    | 47                      | 53                    |
| 17                      | 23                    | 47                      | 55                    |
| <u>17</u>               | <u>24</u>             | 47                      | 57                    |
| 17                      | 25                    | 47                      | 59                    |
| 17                      | 26                    | <u>47</u>               | <u>60</u>             |
| 17                      | 27                    | 47                      | 67                    |

| Deletion starts at exon | Deletion ends at exon | Deletion starts at exon | Deletion ends at exon |
|-------------------------|-----------------------|-------------------------|-----------------------|
| 17                      | 28                    | 47                      | 69                    |
| <u>17</u>               | <u>29</u>             | 47                      | 75                    |
| 17                      | 30                    | 47                      | 78                    |
| 17                      | 31                    | <u>48</u>               | <u>48</u>             |
| 17                      | 32                    | <u>48</u>               | <u>49</u>             |
| 17                      | 33                    | <u>48</u>               | <u>51</u>             |
| <u>17</u>               | <u>34</u>             | <u>48</u>               | <u>53</u>             |
| 17                      | 35                    | <u>48</u>               | <u>55</u>             |
| 17                      | 36                    | <u>48</u>               | <u>57</u>             |
| 17                      | 37                    | <u>48</u>               | <u>59</u>             |
| 17                      | 38                    | 48                      | 60                    |
| 17                      | 39                    | 48                      | 67                    |
| 17                      | 40                    | 48                      | 69                    |
| 17                      | 41                    | 48                      | 75                    |
| 17                      | 42                    | 48                      | 78                    |
| 17                      | 44                    | <u>49</u>               | <u>49</u>             |
| 17                      | 46                    | <u>49</u>               | <u>51</u>             |
| 17                      | 47                    | 49                      | 53                    |
| <u>17</u>               | <u>48</u>             | 49                      | 55                    |
| 17                      | 49                    | 49                      | 57                    |
| 17                      | 51                    | 49                      | 59                    |
| 17                      | 53                    | 49                      | 60                    |
| 17                      | 55                    | 49                      | 67                    |
| 17                      | 57                    | 49                      | 69                    |
| 17                      | 59                    | 49                      | 75                    |
| 17                      | 60                    | 49                      | 78                    |
| 17                      | 67                    | <u>50</u>               | <u>51</u>             |
| 17                      | 69                    | <u>50</u>               | <u>53</u>             |
| 17                      | 75                    | 50                      | 55                    |
| 17                      | 78                    | 50                      | 57                    |
| <u>18</u>               | <u>43</u>             | 50                      | 59                    |
| 18                      | 45                    | 50                      | 60                    |
| 18                      | 54                    | 50                      | 67                    |
| 18                      | 56                    | 50                      | 69                    |
| 18                      | 62                    | 50                      | 75                    |
| 18                      | 65                    | 50                      | 78                    |
| 18                      | 68                    | <u>51</u>               | <u>52</u>             |
| 18                      | 70                    | 51                      | 58                    |
| 18                      | 71                    | 51                      | 61                    |
| 18                      | 72                    | 51                      | 63                    |
| 18                      | 73                    | 51                      | 64                    |
| 18                      | 74                    | 51                      | 66                    |

| Deletion starts at exon | Deletion ends at exon | Deletion starts at exon | Deletion ends at exon |
|-------------------------|-----------------------|-------------------------|-----------------------|
| <u>19</u>               | <u>20</u>             | 51                      | 76                    |
| 19                      | 22                    | 51                      | 77                    |
| 19                      | 23                    | 52                      | 53                    |
| 19                      | 24                    | 52                      | 55                    |
| 19                      | 25                    | 52                      | 57                    |
| 19                      | 26                    | 52                      | 59                    |
| 19                      | 27                    | 52                      | 60                    |
| 19                      | 28                    | 52                      | 67                    |
| 19                      | 29                    | 52                      | 69                    |
| 19                      | 30                    | 52                      | 75                    |
| 19                      | 31                    | 52                      | 78                    |
| 19                      | 32                    | 53                      | 58                    |
| 19                      | 33                    | 53                      | 61                    |
| 19                      | 34                    | 53                      | 63                    |
| 19                      | 35                    | 53                      | 64                    |
| 19                      | 36                    | 53                      | 66                    |
| 19                      | 37                    | 53                      | 76                    |
| 19                      | 38                    | 53                      | 77                    |
| 19                      | 39                    | 54                      | 55                    |
| 19                      | 40                    | 54                      | 57                    |
| 19                      | 41                    | 54                      | 59                    |
| 19                      | 42                    | 54                      | 60                    |
| 19                      | 44                    | 54                      | 67                    |
| 19                      | 46                    | 54                      | 69                    |
| 19                      | 47                    | 54                      | 75                    |
| 19                      | 48                    | 54                      | 78                    |
| 19                      | 49                    | 55                      | 56                    |
| 19                      | 51                    | 55                      | 62                    |
| 19                      | 53                    | 55                      | 65                    |
| 19                      | 55                    | 55                      | 68                    |
| 19                      | 57                    | 55                      | 70                    |
| 19                      | 59                    | 55                      | 71                    |
| 19                      | 60                    | 55                      | 72                    |
| 19                      | 67                    | 55                      | 73                    |
| 19                      | 69                    | 55                      | 74                    |
| 19                      | 75                    | 56                      | 57                    |
| 19                      | 78                    | 56                      | 59                    |
| 20                      | 21                    | 56                      | 60                    |
| <u>20</u>               | <u>50</u>             | 56                      | 67                    |
| 20                      | 52                    | 56                      | 69                    |
| 20                      | 58                    | 56                      | 75                    |
| 20                      | 61                    | 56                      | 78                    |

| Deletion starts at exon | Deletion ends at exon | Deletion starts at exon | Deletion ends at exon |
|-------------------------|-----------------------|-------------------------|-----------------------|
| 20                      | 63                    | 57                      | 62                    |
| 20                      | 64                    | 57                      | 65                    |
| 20                      | 66                    | 57                      | 68                    |
| 20                      | 76                    | 57                      | 70                    |
| 20                      | 77                    | 57                      | 71                    |
| 21                      | 22                    | 57                      | 72                    |
| 21                      | 23                    | 57                      | 73                    |
| 21                      | 24                    | <u>57</u>               | <u>74</u>             |
| 21                      | 25                    | <u>58</u>               | <u>59</u>             |
| 21                      | 26                    | 58                      | 60                    |
| 21                      | 27                    | 58                      | 67                    |
| 21                      | 28                    | 58                      | 69                    |
| 21                      | 29                    | 58                      | 75                    |
| 21                      | 30                    | 58                      | 78                    |
| 21                      | 31                    | 59                      | 61                    |
| 21                      | 32                    | 59                      | 63                    |
| 21                      | 33                    | 59                      | 64                    |
| 21                      | 34                    | 59                      | 66                    |
| 21                      | 35                    | 59                      | 76                    |
| 21                      | 36                    | 59                      | 77                    |
| 21                      | 37                    | <u>60</u>               | <u>60</u>             |
| 21                      | 38                    | 60                      | 67                    |
| 21                      | 39                    | 60                      | 69                    |
| 21                      | 40                    | 60                      | 75                    |
| 21                      | 41                    | 60                      | 78                    |
| 21                      | 42                    | 61                      | 67                    |
| 21                      | 44                    | <u>61</u>               | <u>69</u>             |
| 21                      | 46                    | 61                      | 75                    |
| 21                      | 47                    | 61                      | 78                    |
| 21                      | 48                    | 62                      | 63                    |
| 21                      | 49                    | 62                      | 64                    |
| 21                      | 51                    | 62                      | 66                    |
| 21                      | 53                    | 62                      | 76                    |
| 21                      | 55                    | 62                      | 77                    |
| 21                      | 57                    | 63                      | 65                    |
| 21                      | 59                    | 63                      | 68                    |
| 21                      | 60                    | 63                      | 70                    |
| 21                      | 67                    | 63                      | 71                    |
| 21                      | 69                    | 63                      | 72                    |
| 21                      | 75                    | 63                      | 73                    |
| 21                      | 78                    | 63                      | 74                    |
| 22                      | 50                    | 64                      | 64                    |



| Deletion starts at exon | Deletion ends at exon | Deletion starts at exon | Deletion ends at exon |
|-------------------------|-----------------------|-------------------------|-----------------------|
| 22                      | 52                    | 64                      | 66                    |
| 22                      | 58                    | 64                      | 76                    |
| 22                      | 61                    | 64                      | 77                    |
| 22                      | 63                    | 65                      | 66                    |
| 22                      | 64                    | 65                      | 76                    |
| 22                      | 66                    | 65                      | 77                    |
| 22                      | 76                    | 66                      | 68                    |
| 22                      | 77                    | 66                      | 70                    |
| 23                      | 23                    | 66                      | 71                    |
| 23                      | 24                    | 66                      | 72                    |
| 23                      | 25                    | 66                      | 73                    |
| 23                      | 26                    | 66                      | 74                    |
| 23                      | 27                    | 67                      | 76                    |
| 23                      | 28                    | 67                      | 77                    |
| 23                      | 29                    | 68                      | 69                    |
| 23                      | 30                    | 68                      | 75                    |
| 23                      | 31                    | 68                      | 78                    |
| 23                      | 32                    | 69                      | 70                    |
| 23                      | 33                    | 69                      | 71                    |
| 23                      | 34                    | 69                      | 72                    |
| 23                      | 35                    | 69                      | 73                    |
| 23                      | 36                    | 69                      | 74                    |
| 23                      | 37                    | 70                      | 75                    |
| 23                      | 38                    | 70                      | 78                    |
| 23                      | 39                    | 71                      | 71                    |
| 23                      | 40                    | 71                      | 72                    |
| 23                      | 41                    | 71                      | 73                    |
| 23                      | 42                    | 71                      | 74                    |
| 23                      | 44                    | 72                      | 72                    |
| 23                      | 46                    | 72                      | 73                    |
| 23                      | 47                    | 72                      | 74                    |
| 23                      | 48                    | 73                      | 73                    |
| 23                      | 49                    | 73                      | 74                    |
| 23                      | 51                    | 74                      | 74                    |
| 23                      | 53                    | 76                      | 78                    |
| 23                      | 55                    | 77                      | 77                    |
