# Supplementary material for: A Genotype-Phenotype Correlation Study of Exon Skip-Equivalent In-Frame Deletions and Exon Skip-Amenable Out-of-Frame Deletions across the DMD Gene to Simulate the Effects of Exon-Skipping Therapies: A Meta-Analysis
Source: MDPI journal article supplement (doi:10.3390/jpm11010046), 2021-01-14
Supplement: s1 [file s1]

**Table S1:** Clinical data obtained from literature searching.

| In-frame deletion<br>starts at exon | In-frame deletion<br>ends at exon | Clinical phenotype |                       | References |
|-------------------------------------|-----------------------------------|--------------------|-----------------------|------------|
|                                     |                                   | DMD                | BMD &<br>Asymptomatic |            |
| 2                                   | 7                                 | 1                  | 4                     | [1,2]      |
| 2                                   | 50                                | 1                  |                       | [3]        |
| 3                                   | 3                                 | 1                  | 3                     | [1,4,5]    |
| 3                                   | 4                                 | 1                  | 7                     | [2,3,5,6]  |
| 3                                   | 5                                 |                    | 1                     | [6]        |
| 3                                   | 6                                 | 1                  |                       | [3]        |
| 3                                   | 8                                 |                    | 1                     | [7]        |
| 3                                   | 10                                | 1                  |                       | [8]        |
| 3                                   | 13                                | 5                  |                       | [2,8,9]    |
| 3                                   | 18                                | 2                  |                       | [3]        |
| 3                                   | 26                                | 2                  |                       | [8]        |
| 3                                   | 27                                | 2                  |                       | [8]        |
| 3                                   | 29                                | 1                  | 1                     | [8]        |
| 3                                   | 30                                | 1                  |                       | [8]        |
| 3                                   | 33                                | 1                  |                       | [8]        |
| 3                                   | 34                                | 1                  |                       | [7]        |
| 3                                   | 35                                | 1                  |                       | [7]        |
| 3                                   | 37                                | 3                  |                       | [3,7,8]    |
| 3                                   | 39                                |                    | 1                     | [10]       |
| 3                                   | 44                                | 7                  |                       | [2,3,7,8]  |
| 4                                   | 4                                 |                    | 3                     | [2,4,6]    |
| 5                                   | 5                                 | 2                  | 1                     | [2-4]      |
| 5                                   | 9                                 |                    | 3                     | [6,10]     |
| 5                                   | 13                                | 2                  |                       | [2]        |
| 5                                   | 15                                |                    | 1                     | [10]       |
| 5                                   | 16                                |                    | 1                     | [2]        |
| 5                                   | 27                                | 1                  |                       | [7]        |
| 5                                   | 33                                | 1                  |                       | [8]        |
| 6                                   | 33                                | 1                  |                       | [3]        |
| 6                                   | 48                                | 1                  |                       | [8]        |
| 8                                   | 19                                | 3                  |                       | [1,3,9]    |
| 8                                   | 21                                | 3                  | 1                     | [8]        |
| 10                                  | 10                                |                    | 1                     | [6]        |
| 10                                  | 12                                | 1                  |                       | [1]        |
| 10                                  | 13                                | 2                  |                       | [3,10]     |
| 10                                  | 25                                |                    | 1                     | [6]        |

|    |    |   |   |         |
|----|----|---|---|---------|
| 10 | 30 | 1 |   | [8]     |
| 10 | 33 |   | 1 | [6]     |
| 10 | 34 | 2 | 1 | [3,6,8] |
| 10 | 41 | 1 |   | [8]     |
| 10 | 42 |   | 1 | [6]     |
| 10 | 44 | 3 | 1 | [3,6,8] |
| 11 | 39 | 1 |   | [7]     |
| 12 | 43 | 2 | 1 | [5,6,8] |
| 13 | 13 | 1 | 3 | [4,6,7] |
| 13 | 18 |   | 1 | [6]     |
| 13 | 34 | 1 |   | [8]     |
| 13 | 41 | 1 |   | [7]     |
| 13 | 44 |   | 1 | [6]     |
| 13 | 47 | 1 |   | [2]     |
| 14 | 14 | 1 |   | [8]     |
| 14 | 27 |   | 1 | [10]    |
| 14 | 30 | 1 |   | [3]     |
| 14 | 36 |   | 1 | [10]    |
| 14 | 39 |   | 1 | [2]     |
| 14 | 40 |   | 1 | [2]     |
| 14 | 41 |   | 5 | [6]     |
| 14 | 51 |   | 1 | [10]    |
| 15 | 15 | 1 |   | [3]     |
| 15 | 29 | 1 |   | [3]     |
| 16 | 23 | 1 |   | [3]     |
| 17 | 30 | 1 |   | [8]     |
| 17 | 34 | 1 |   | [7]     |
| 18 | 43 | 1 |   | [7]     |
| 19 | 44 |   | 2 | [6]     |
| 24 | 48 |   | 1 | [6]     |
| 26 | 34 | 1 |   | [8]     |
| 28 | 29 |   | 1 | [4]     |
| 30 | 30 | 1 |   | [3]     |
| 30 | 31 | 1 |   | [3]     |
| 33 | 34 |   | 1 | [4]     |
| 34 | 34 | 1 |   | [8]     |
| 34 | 44 |   | 2 | [6]     |
| 36 | 36 |   | 1 | [4]     |
| 41 | 41 |   | 2 | [4]     |
| 44 | 45 | 1 |   | [8]     |
| 45 | 46 | 2 |   | [2,8]   |

|              |    |     |     |                 |
|--------------|----|-----|-----|-----------------|
| 45           | 47 | 21  | 80  | [2,3,5–8,11,12] |
| 45           | 48 | 17  | 40  | [2,3,6–8,11,12] |
| 45           | 49 | 11  | 18  | [2,3,6,8,12]    |
| 45           | 51 | 1   | 3   | [2,6,12]        |
| 45           | 53 | 6   | 9   | [2,3,6–8]       |
| 45           | 55 | 3   | 17  | [2,3,6,8]       |
| 45           | 54 | 7   | 1   | [3,6]           |
| 45           | 57 | 1   |     | [3]             |
| 47           | 47 | 1   |     | [3]             |
| 47           | 48 | 1   |     | [2]             |
| 47           | 51 | 1   |     | [5]             |
| 48           | 48 | 8   | 4   | [2,3,6–8]       |
| 48           | 49 | 8   | 8   | [2,3,7,8,12]    |
| 48           | 51 | 6   | 2   | [2,3,8,12]      |
| 48           | 55 | 2   | 2   | [6,7]           |
| 48           | 67 | 1   |     | [8]             |
| 49           | 51 | 2   | 1   | [2,3,9]         |
| 51           | 52 | 3   | 2   | [8]             |
| 52           | 53 | 1   |     | [5]             |
| 56           | 60 | 1   |     | [3]             |
| 64           | 64 | 2   |     | [7,8]           |
| 65           | 76 | 1   |     | [5]             |
| <b>Total</b> |    | 183 | 248 |                 |

## References:

1. Vieitez, I.; Gallano, P.; González-Quereda, L.; Borrego, S.; Marcos, I.; Millán, J.M.; Jairo, T.; Prior, C.; Molano, J.; Trujillo-Tiebas, M.J.; et al. Mutational spectrum of Duchenne muscular dystrophy in Spain: study of 284 cases. *Neurología* 2017, 32, 377–385, doi:10.1016/j.nrleng.2015.12.004.
2. Mah, J.K.; Selby, K.; Campbell, C.; Nadeau, A.; Tarnopolsky, M.; McCormick, A.; Dooley, J.M.; Kolski, H.; Skalsky, A.J.; Smith, R.G.; et al. A population-based study of dystrophin mutations in Canada. *Can. J. Neurol. Sci.* 2011, 38, 465–74, doi:10.1017/s0317167100011896.
3. Guo, R.; Zhu, G.; Zhu, H.; Ma, R.; Peng, Y.; Liang, D.; Wu, L. DMD mutation spectrum analysis in 613 Chinese patients with dystrophinopathy. *J. Hum. Genet.* 2015, 60, 435–442, doi:10.1038/jhg.2015.43.
4. Deburgrave, N.; Daoud, F.; Llense, S.; Barbot, J.C.; Récan, D.; Peccate, C.; Burghes, A.H.M.; Bérout, C.; Garcia, L.; Kaplan, J.-C.; et al. Protein- and mRNA-based phenotype-genotype correlations in DMD/BMD with point mutations and molecular basis for BMD with nonsense and frameshift mutations in the DMD gene. *Hum. Mutat.* 2007, 28, 183–195, doi:10.1002/humu.20422.
5. Fain-man Lo, I.; Lai, K.K.; Tong, T.M.; Lam, S.T. A different spectrum of DMD gene mutations in local Chinese patients with Duchenne/Becker muscular dystrophy. *Chin. Med. J. (Engl.)* 2006, 119, 1079–87.
6. Mori-Yoshimura, M.; Mitsuhashi, S.; Nakamura, H.; Komaki, H.; Goto, K.; Yonemoto, N.; Takeuchi, F.; Hayashi, Y.K.; Murata, M.; Takahashi, Y.; et al. Characteristics of Japanese Patients with Becker Muscular

- Dystrophy and Intermediate Muscular Dystrophy in a Japanese National Registry of Muscular Dystrophy (Remudy): Heterogeneity and Clinical Variation. *J. Neuromuscul. Dis.* 2018, 5, 193–203, doi:10.3233/JND-170225.
7. Tran, V.K.; Ta, V.T.; Vu, D.C.; Nguyen, S.T.-B.; Do, H.N.; Ta, M.H.; Tran, T.H.; Matsuo, M. Exon Deletion Patterns of the Dystrophin Gene in 82 Vietnamese Duchenne/Becker Muscular Dystrophy Patients. *J. Neurogenet.* 2013, 27, 170–175, doi:10.3109/01677063.2013.830616.
  8. Yang, J.; Li, S.Y.; Li, Y.Q.; Cao, J.Q.; Feng, S.W.; Wang, Y.Y.; Zhan, Y.X.; Yu, C.S.; Chen, F.; Li, J.; et al. MLPA-based genotype–phenotype analysis in 1053 Chinese patients with DMD/BMD. *BMC Med. Genet.* 2013, 14, 29, doi:10.1186/1471-2350-14-29.
  9. Rani, A.Q.; Sasongko, T.H.; Sulong, S.; Bunyan, D.; Salmi, A.R.; Zilfalil, B.A.; Matsuo, M.; Zabidi-Hussin, Z.A.M.H. Mutation spectrum of dystrophin gene in malaysian patients with Duchenne/Becker muscular dystrophy. *J. Neurogenet.* 2013, 27, 11–5, doi:10.3109/01677063.2012.762580.
  10. Ji, X.; Zhang, J.; Xu, Y.; Long, F.; Sun, W.; Liu, X.; Chen, Y.; Jiang, W. MLPA Application in Clinical Diagnosis of DMD/BMD in Shanghai. *J. Clin. Lab. Anal.* 2015, 29, 405–411, doi:10.1002/jcla.21787.
  11. Todorova, A.; Todorov, T.; Georgieva, B.; Lukova, M.; Guergueltcheva, V.; Kremensky, I.; Mitev, V. MLPA analysis/complete sequencing of the DMD gene in a group of Bulgarian Duchenne/Becker muscular dystrophy patients. *Neuromuscul. Disord.* 2008, 18, 667–70, doi:10.1016/j.nmd.2008.06.369.
  12. Li, Y.; Liu, Z.; OuYang, S.; Zhu, Y.; Wang, L.; Wu, J. Distribution of dystrophin gene deletions in a Chinese population. *J. Int. Med. Res.* 2016, 44, 99–108, doi:10.1177/0300060515613223.
